# Supplementary material for: Inhibition of basal-like breast cancer growth by FTY720 in combination with epidermal growth factor receptor kinase blockade
Source: PubMed Central journal article supplement (PMC5545026; doi:10.1186/s13058-017-0882-x), 2017-08-04
Supplement: 13058_2017_882_MOESM2_ESM.pdf [file 13058_2017_882_MOESM2_ESM.pdf]

## Supplementary Figure 2

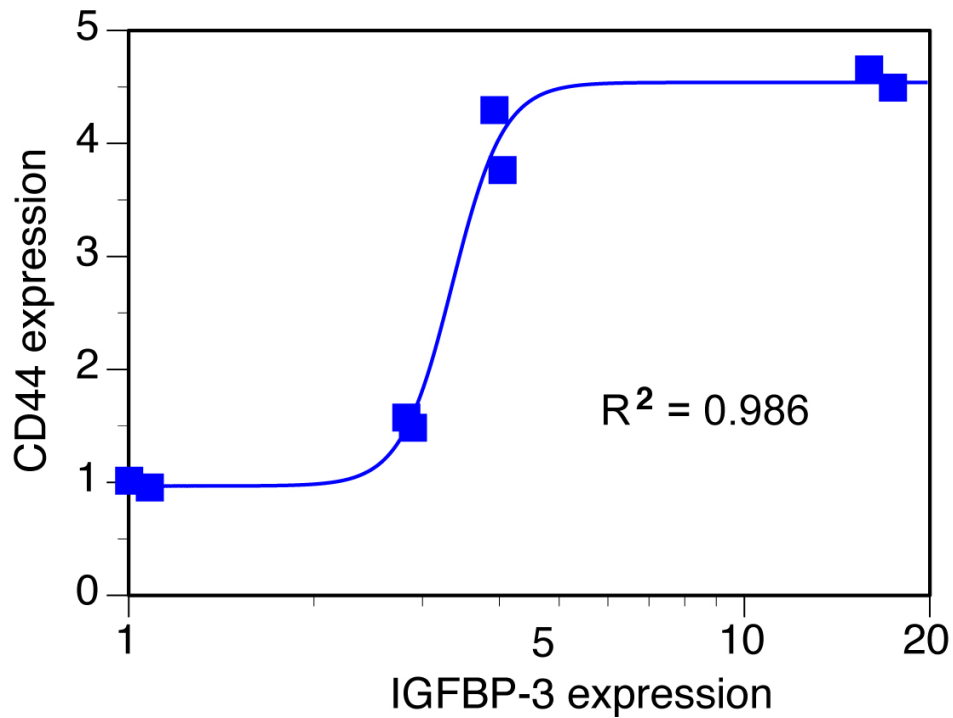

**Supplementary Figure 2. Relationship between IGFBP-3 mRNA and CD44 mRNA levels in HCC1806 clones with varying IGFBP-3 expression.** Total RNA was extracted from duplicate cultures, reverse-transcribed and analyzed by qRT-PCR in duplicate as previously described (13). Data points for each mRNA species were expressed relative to a single low-IGFBP-3 clone (B10) and were fitted using a 4-parameter sigmoid logistic curve.
