# Supplementary material for: Inhibition of basal-like breast cancer growth by FTY720 in combination with epidermal growth factor receptor kinase blockade
Source: PubMed Central journal article supplement (PMC5545026; doi:10.1186/s13058-017-0882-x), 2017-08-04
Supplement: 13058_2017_882_MOESM4_ESM.pdf [file 13058_2017_882_MOESM4_ESM.pdf]

## Supplementary Figure 4

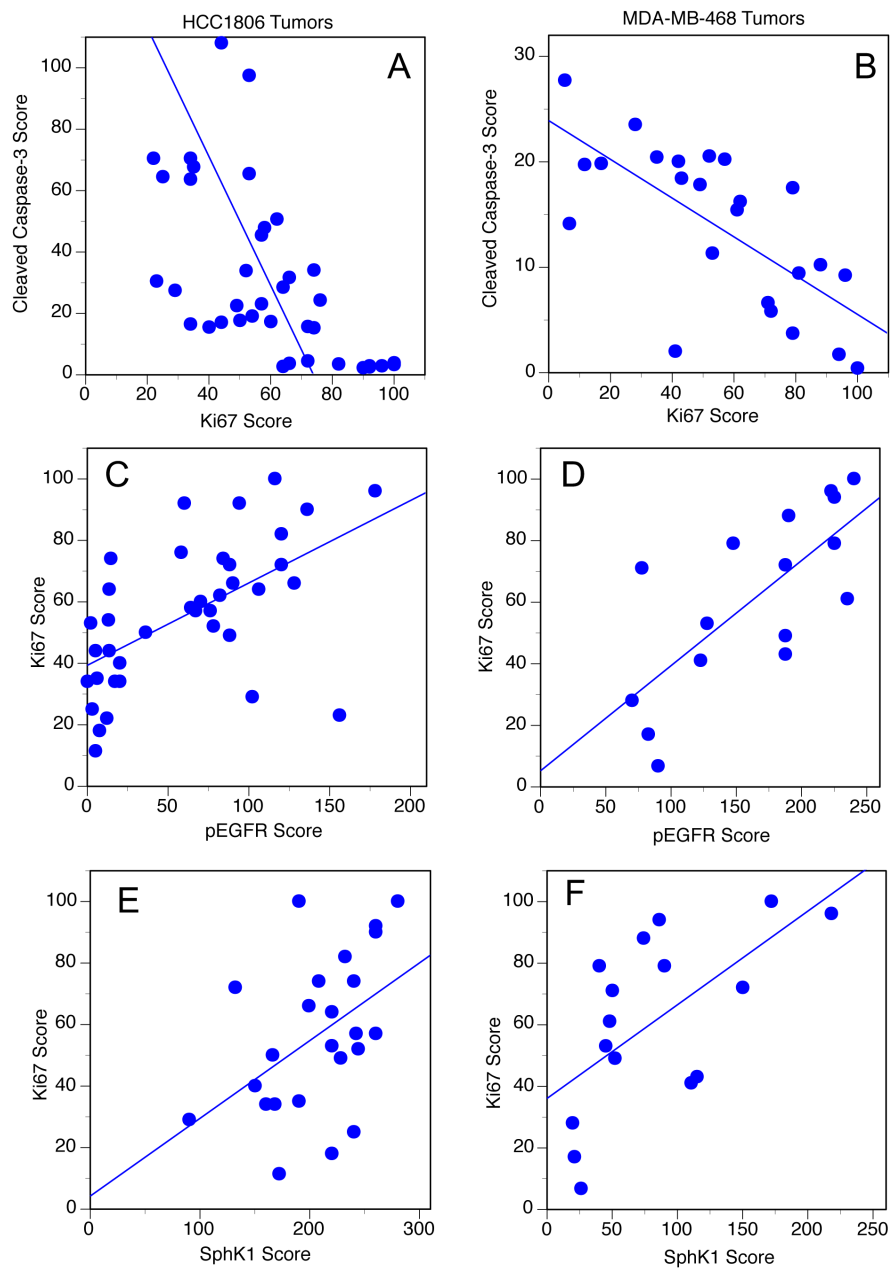

**Supplementary Figure 4. Correlations among immunohistochemical scores for cleaved caspase-3, Ki67, pEGFR and SphK1, in HCC1806 and MDA-MB-468 xenograft tumors.**

Data are from the experiments shown in Figure 6. Correlations were assessed using Pearson's correlation coefficient with 2-tailed P-values.

A, C, E: HCC1806 tumors. A: cleaved caspase-3 vs. Ki67:  $n = 38$ ,  $r = -0.602$ ,  $P < 0.001$ . C: Ki67 vs. pEGFR:  $n = 38$ ,  $r = 0.576$ ,  $P < 0.001$ . E: Ki67 vs. SphK1:  $n = 24$ ,  $r = 0.462$ ,  $P = 0.023$ .

B, D, F: MDA-MB-468 tumors. B: cleaved caspase-3 vs. Ki67:  $n = 25$ ,  $r = -0.705$ ,  $P < 0.001$ . D: Ki67 vs. pEGFR:  $n = 16$ ,  $r = 0.726$ ,  $P = 0.001$ . F: Ki67 vs. SphK1:  $n = 16$ ,  $r = 0.614$ ,  $P = 0.011$ .
