# Supplementary material for: Inhibition of basal-like breast cancer growth by FTY720 in combination with epidermal growth factor receptor kinase blockade
Source: PubMed Central journal article supplement (PMC5545026; doi:10.1186/s13058-017-0882-x), 2017-08-04
Supplement: 13058_2017_882_MOESM5_ESM.pdf [file 13058_2017_882_MOESM5_ESM.pdf]

## Supplementary Figure 5

A

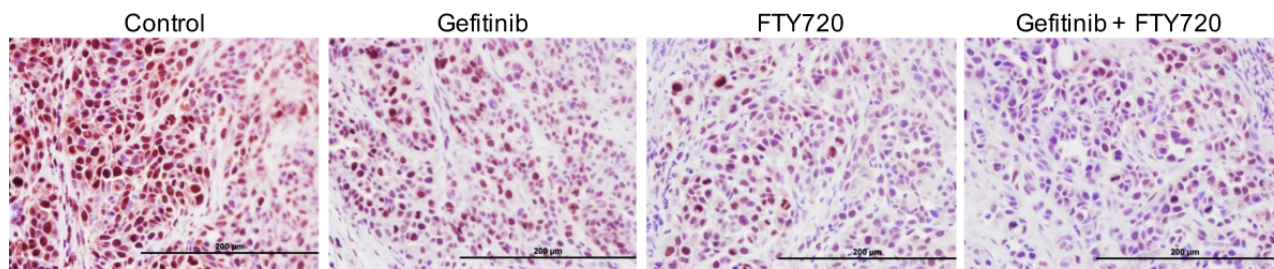

B

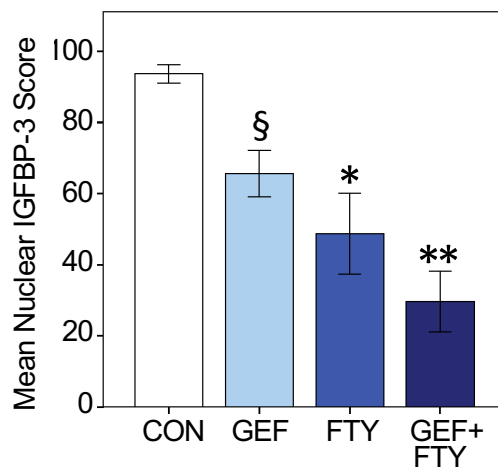

**Supplementary Figure 5. Immunohistochemical analysis of nuclear IGFBP-3 in HCC1806 tumors from control, gefitinib-treated (GEF), FTY720-treated (FTY), and combination-treated mice.**

A: Tumors were stained for nuclear IGFBP-3, scored as described under Methods. Representative images from each treatment group (Bar = 200  $\mu$ m). B: Summary data are mean values  $\pm$  SEM (n=6 per group), analyzed by 1-way ANOVA followed by post-hoc Tukey's test. \*P=0.005, \*\*P<0.001 compared to control; §P<0.025 compared to combination.
